# Supplementary material
Source: publisher figshare collection journal article supplement (https://frontiersin.figshare.com/ndownloader/files/35456246)
Supplement: Supplementary file 1 [file 35456246]

## Appendix 1

| <b>No.</b> | <b>CONVENIENCE</b>        | <b>HEALTH</b>           | <b>TASTE</b>           | <b>PROCESS</b>          |
|------------|---------------------------|-------------------------|------------------------|-------------------------|
| 1 set      | Easy and quick to prepare | Nutritionally enriched  | Of preferred taste     | Organically produced    |
| 2 set      | Difficult to prepare      | Potentially detrimental | Of preferred taste     | Organically produced    |
| 3 set      | Easy and quick to prepare | Healthy                 | Of neutral taste       | Organically produced    |
| 4 set      | Difficult to obtain       | Potentially detrimental | Of neutral taste       | Organically produced    |
| 5 set      | Difficult to prepare      | Healthy                 | Of non-preferred taste | Organically produced    |
| 6 set      | Difficult to obtain       | Nutritionally enriched  | Of non-preferred taste | Organically produced    |
| 7 set      | Difficult to obtain       | Healthy                 | Of preferred taste     | Conventionally produced |
| 8 set      | Difficult to prepare      | Nutritionally enriched  | Of neutral taste       | Conventionally produced |
| 9 set      | Easy and quick to prepare | Potentially detrimental | Of non-preferred taste | Conventionally produced |
